# Supplementary material
Source: publisher figshare collection journal article supplement (https://tandf.figshare.com/ndownloader/files/22064067)
Supplement: Supplementary file 1 [file 22064067]

Supplementary materials

Soil–plant interactions in a pasture of the Italian Alps

Chiara Ferré1, Marco Caccianiga2, Magda Zanzottera2,3, Roberto Comolli1

1Department of Earth and Environmental Sciences, Milan Bicocca University, Milan, Italy

2Department of Biosciences, Milan University, Milan, Italy

3Department of Biotechnology and Life Sciences, Insubria University, Varese, Italy

**Table S1.** Vegetation types, CSR values (%) and CSR strategy class for each investigated point.

| Point | Veg. Type | C | S | R | CSR class |
| --- | --- | --- | --- | --- | --- |
| 92 | S | 25.4 | 54.0 | 20.6 | S |
| 55 | S | 22.1 | 58.4 | 19.5 | S |
| 67 | S | 21.6 | 55.2 | 23.3 | S |
| 33 | S | 18.3 | 56.1 | 25.6 | S |
| 68 | S | 15.0 | 52.2 | 32.7 | S |
| 16 | RP | 27.0 | 48.9 | 24.1 | CS |
| 106 | RP | 22.8 | 56.0 | 21.2 | S |
| 29 | RP | 21.6 | 60.0 | 18.4 | S |
| RP2 | RP | 20.4 | 47.8 | 31.8 | SR |
| RP1 | RP | 20.2 | 46.3 | 33.5 | SR |
| 32 | RP | 20.1 | 60.7 | 19.1 | S |
| 39 | RP | 17.8 | 62.9 | 19.3 | S |
| RP3 | RP | 17.2 | 52.5 | 30.3 | S |
| 105 | RP | 16.7 | 55.7 | 27.6 | S |
| RN3 | RP | 12.0 | 66.0 | 22.0 | S |
| 44 | N | 17.5 | 51.2 | 31.2 | S |
| 86 | N | 15.4 | 66.2 | 18.4 | S |
| 70 | N | 12.1 | 66.3 | 21.6 | S |
| RN1 | N | 11.8 | 68.6 | 19.6 | S |
| 53 | N | 11.8 | 74.6 | 13.6 | S |
| 90 | N | 10.1 | 73.5 | 16.4 | S |
| RN2 | N | 9.6 | 69.0 | 21.4 | S |
| 49 | EH | 12.0 | 49.4 | 38.6 | SR |
| 37 | EH | 11.4 | 53.0 | 35.6 | S |
| 111 | EH | 9.6 | 75.9 | 14.5 | S |
| 36 | EH | 9.4 | 45.2 | 45.4 | SR |
| RS1 | B | 21.4 | 52.1 | 26.5 | S |
| RS2 | B | 19.1 | 56.6 | 24.3 | S |
| RS3 | B | 17.6 | 55.2 | 27.2 | S |
| 96 | B | 13.1 | 60.3 | 26.6 | S |
| 102 | B | 12.5 | 65.2 | 22.3 | S |
| 103 | B | 11.7 | 67.3 | 21.0 | S |
| 13 | B | 11.1 | 62.5 | 26.3 | S |
| 40 | B | 11.1 | 61.6 | 27.3 | S |
| 8 | B | 9.7 | 70.3 | 20.0 | S |

R: Rich pasture; EH: Earth hummocks; SV: *Sesleria varia* grassland; B: Bentgrass; N: *Nardus stricta* pasture.

S: stress-tolerant strategy ; C: competitive strategy; R: ruderal strategy; SC: stress-tolerant-competitive strategy ; SR: stess-tolerant-ruderal strategy.

**Table S2.** Mean estimates and their standard error of the fixed effects. The response variables are the soil and environmental variables; the fixed effect is vegetation type. For abbreviations of variables, see table 1.

Sp. (Gau): residuals were spatial correlated and the spatial covariance function of residuals was the Gaussian model; Non-sp.: residuals were non-spatial correlated; g defines gaussian variable

* Different letters denote statistically significant (p value < 0.05) differences between vegetation types.

| Variables | Model Type | Statistics | B | EH | N | RP | S |
| --- | --- | --- | --- | --- | --- | --- | --- |
|  |  |  |  |  |  |  |  |
| SOCstock | Non-sp | estimate | 6.403 | 3.450 | 5.499 | 5.123 | 4.564 |
|  |  | SE | 0.379 | 0.568 | 0.429 | 0.359 | 0.508 |
|  |  | Pr > |t| | <.0001 | <.0001 | <.0001 | <.0001 | <.0001 |
|  |  | * | a | c | ab | b | bc |
| gCHUM | Sp. (Gau) | estimate | -0.100 | -1.403 | 0.201 | 0.121 | -0.130 |
|  |  | SE | 0.338 | 0.558 | 0.342 | 0.363 | 0.411 |
|  |  | Pr > |t| | a | a | a | a | a |
| CFA | Non-sp. | estimate | 12.940 | 7.437 | 13.165 | 11.602 | 10.028 |
|  |  | SE | 0.778 | 1.167 | 0.882 | 0.738 | 1.044 |
|  |  | Pr > |t| | <.0001 | <.0001 | <.0001 | <.0001 | <.0001 |
|  |  | * | a | c | a | ab | bc |
| CHA | Non-sp. | estimate | 25.10 | 9.0 | 22.90 | 19.81 | 22.55 |
|  |  | SE | 1.76 | 2.65 | 2.00 | 1.67 | 2.37 |
|  |  | Pr > |t| | <.0001 | <.0001 | <.0001 | .0002 | <.0001 |
|  |  | * | a | b | a | a | a |
| totN | Non-sp. | estimate | 0.832 | 0.300 | 0.814 | 0.737 | 0.864 |
|  |  | SE | 0.074 | 0.111 | 0.084 | 0.070 | 0.099 |
|  |  | Pr > |t| | <.0001 | .0116 | <.0001 | <.0001 | <.0001 |
|  |  | * | a | b | a | a | a |
| gCN | Non-sp. | estimate | 0.075 | 1.415 | -0.182 | -0.559 | 0.106 |
|  |  | SE | 0.279 | 0.418 | 0.316 | -0.559 | 0.106 |
|  |  | Pr > |t| | .7888 | .0020 | .5679 | .0433 | .7792 |
|  |  | * | b | a | b | b | b |
| pHw | Non-sp. | estimate | 4.92 | 4.57 | 4.91 | 5.09 | 6.44 |
|  |  | SE | 0.16 | 0.24 | 0.18 | 0.15 | 0.21 |
|  |  | Pr > |t| | <.0001 | <.0001 | <.0001 | <.0001 | <.0001 |
|  |  | * | b | b | b | b | a |
| cSand | Sp. (Gau) | estimate | 370 | 279 | 319 | 381 | 397 |
|  |  | SE | 27.66 | 40.67 | 25.04 | 25.47 | 33.90 |
|  |  | Pr > |t| | <.0001 | <.0001 | <.0001 | <.0001 | <.0001 |
|  |  | * | ab | bc | ac | ab | a |
| Silt | Non-sp. | estimate | 338 | 511 | 374 | 373 | 315 |
|  |  | SE | 21.2 | 31.8 | 24.0 | 20.1 | 28.4 |
|  |  | Pr > |t| | <.0001 | <.0001 | <.0001 | <.0001 | <.0001 |
|  |  | * | b | a | b | b | b |
| Clay | Non-sp. | estimate | 76 | 80 | 73 | 71 | 59 |
|  |  | SE | 5.0 | 7.5 | 5.6 | 4.7 | 6.7 |
|  |  | Pr > |t| | <.0001 | <.0001 | <.0001 | <.0001 | <.0001 |
|  |  | * | a | a | a | a | b |
| gBD | Non-sp. | estimate | 0.014 | 1.485 | -0.265 | -0.038 | -0.766 |
|  |  | SE | 0.274 | 0.411 | 0.310 | 0.259 | 0.376 |
|  |  | Pr > |t| | .9583 | .0011 | .3992 | .8847 | .0458 |
|  |  | * | b | a | bc | bc | c |
| avP | Sp. (Sph) | estimate | 34.2 | 9.65 | 25.9 | 31.5 | 18.4 |
|  |  | SE | 6.0 | 9.0 | 5.2 | 5.3 | 6.8 |
|  |  | Pr > |t| | <.0001 | .3005 | <.0001 | <.0001 | .0116 |
|  |  | * | a | c | abc | ab | bc |
| vfRoots | Non-sp. | estimate | 4.27 | 5.73 | 4.91 | 4.25 | 6.65 |
|  |  | SE | 0.81 | 1.22 | 0.92 | 0.77 | 1.09 |
|  |  | Pr > |t| | <.0001 | <.0001 | <.0001 | <.0001 | <.0001 |
|  |  | + | b | ab | ab | b | a |
|  |  | estimate | -0.077 | 0.310 | -005 | -0.159 | 0.218 |
| gfRoots | Non-sp. | SE | 0.342 | 0.513 | 0.387 | 0.324 | 0.459 |
|  |  | Pr > |t| | .8217 | .5503 | .9883 | .6278 | .6383 |
|  |  | + | b | a | ab | ab | ab |
|  |  | estimate | 0.633 | -0.452 | -0.659 | -0.150 | 0.444 |
| gRad | Non-sp. | SE | 0.297 | 0.446 | 0.337 | 0.282 | 0.398 |
|  |  | Pr > |t| | .0414 | .3183 | .0601 | .5987 | .2744 |
|  |  | * | a | ab | b | ab | a |
|  |  | estimate | 0.157 | -0.402 | -0.121 | -0.351 | 0.912 |
| gT | Non-sp. | SE | 0.311 | 0.467 | 0.353 | 0.295 | 0.417 |
|  |  | Pr > |t| | .6185 | .3956 | .7333 | .2440 | .0370 |
|  |  |  | a | a | a | a | a |
|  |  | estimate | 37.1 | 41.7 | 47.2 | 48.5 | 34.7 |
| WFPS | Non-sp | SE | 2.5 | 3.8 | 2.9 | 2.4 | 3.4 |
|  |  | Pr > |t| | <.0001 | <.0001 | <.0001 | <.0001 | <.0001 |
|  |  | * | b | ab | a | a | b |
|  |  | estimate | 23 | 1 | 39 | 11 | 37 |
| slope | Non-sp. | SE | 4.2 | 6.3 | 4.8 | 4.0 | 5.6 |
|  |  | Pr > |t| | <.0001 | .9071 | <.0001 | .0111 | <.0001 |
|  |  | * | b | c | a | c | ab |
|  |  |  |  |  |  |  |  |

+ Different letters denote statistically significant (p value < 0.1) differences between vegetation types.
